# Supplementary material
Source: publisher figshare collection journal article supplement (https://acs.figshare.com/ndownloader/files/4446196)
Supplement: Supplementary file 1 [file 4446196]

 
data_a 
 
_audit_creation_method            SHELXL-97 
_chemical_name_systematic 
; 
 ? 
; 
_chemical_name_common             ? 
_chemical_melting_point           ? 
_chemical_formula_moiety          ? 
_chemical_formula_sum 
 'C62 H62 N16 O6' 
_chemical_formula_weight          1127.28 
 
loop_ 
 _atom_type_symbol 
 _atom_type_description 
 _atom_type_scat_dispersion_real 
 _atom_type_scat_dispersion_imag 
 _atom_type_scat_source 
 'C'  'C'   0.0033   0.0016 
 'International Tables Vol C Tables 4.2.6.8 and 6.1.1.4' 
 'H'  'H'   0.0000   0.0000 
 'International Tables Vol C Tables 4.2.6.8 and 6.1.1.4' 
 'N'  'N'   0.0061   0.0033 
 'International Tables Vol C Tables 4.2.6.8 and 6.1.1.4' 
 'O'  'O'   0.0106   0.0060 
 'International Tables Vol C Tables 4.2.6.8 and 6.1.1.4' 
 
_symmetry_cell_setting            ? 
_symmetry_space_group_name_H-M    ? 
 
loop_ 
 _symmetry_equiv_pos_as_xyz 
 'x, y, z' 
 '-x, -y, -z' 
 
_cell_length_a                    10.127(6) 
_cell_length_b                    10.975(7) 
_cell_length_c                    13.919(8) 
_cell_angle_alpha                 98.512(8) 
_cell_angle_beta                  109.130(7) 
_cell_angle_gamma                 93.757(8) 
_cell_volume                      1434.7(15) 
_cell_formula_units_Z             1 
_cell_measurement_temperature     296(2) 
_cell_measurement_reflns_used     ? 
_cell_measurement_theta_min       ? 
_cell_measurement_theta_max       ? 
 
_exptl_crystal_description        ? 
_exptl_crystal_colour             ? 
_exptl_crystal_size_max           0.48 
_exptl_crystal_size_mid           0.35 
_exptl_crystal_size_min           0.19 
_exptl_crystal_density_meas       ? 
_exptl_crystal_density_diffrn     1.305 
_exptl_crystal_density_method     'not measured' 
_exptl_crystal_F_000              594 
_exptl_absorpt_coefficient_mu     0.088 
_exptl_absorpt_correction_type    ? 
_exptl_absorpt_correction_T_min   0.9591 
_exptl_absorpt_correction_T_max   0.9835 
_exptl_absorpt_process_details    ? 
 
_exptl_special_details 
; 
 ? 
; 
 
_diffrn_ambient_temperature       296(2) 
_diffrn_radiation_wavelength      0.71073 
_diffrn_radiation_type            MoK\a 
_diffrn_radiation_source          'fine-focus sealed tube' 
_diffrn_radiation_monochromator   graphite 
_diffrn_measurement_device_type   ? 
_diffrn_measurement_method        ? 
_diffrn_detector_area_resol_mean  ? 
_diffrn_standards_number          ? 
_diffrn_standards_interval_count  ? 
_diffrn_standards_interval_time   ? 
_diffrn_standards_decay_%         ? 
_diffrn_reflns_number             10642 
_diffrn_reflns_av_R_equivalents   0.0497 
_diffrn_reflns_av_sigmaI/netI     0.0749 
_diffrn_reflns_limit_h_min        -12 
_diffrn_reflns_limit_h_max        11 
_diffrn_reflns_limit_k_min        -13 
_diffrn_reflns_limit_k_max        13 
_diffrn_reflns_limit_l_min        -16 
_diffrn_reflns_limit_l_max        15 
_diffrn_reflns_theta_min          2.67 
_diffrn_reflns_theta_max          25.50 
_reflns_number_total              5188 
_reflns_number_gt                 3015 
_reflns_threshold_expression      >2sigma(I) 
 
_computing_data_collection        ? 
_computing_cell_refinement        ? 
_computing_data_reduction         ? 
_computing_structure_solution     'SHELXS-97 (Sheldrick, 1990)' 
_computing_structure_refinement   'SHELXL-97 (Sheldrick, 1997)' 
_computing_molecular_graphics     ? 
_computing_publication_material   ? 
 
_refine_special_details 
; 
 Refinement of F^2^ against ALL reflections.  The weighted R-factor wR and 
 goodness of fit S are based on F^2^, conventional R-factors R are based 
 on F, with F set to zero for negative F^2^. The threshold expression of 
 F^2^ > 2sigma(F^2^) is used only for calculating R-factors(gt) etc. and is 
 not relevant to the choice of reflections for refinement.  R-factors based 
 on F^2^ are statistically about twice as large as those based on F, and R- 
 factors based on ALL data will be even larger. 
; 
 
_refine_ls_structure_factor_coef  Fsqd  
_refine_ls_matrix_type            full 
_refine_ls_weighting_scheme       calc  
_refine_ls_weighting_details 
 'calc w=1/[\s^2^(Fo^2^)+(0.1480P)^2^+0.0000P] where P=(Fo^2^+2Fc^2^)/3' 
_atom_sites_solution_primary      direct 
_atom_sites_solution_secondary    difmap 
_atom_sites_solution_hydrogens    geom 
_refine_ls_hydrogen_treatment     mixed 
_refine_ls_extinction_method      none 
_refine_ls_extinction_coef        ? 
_refine_ls_number_reflns          5188 
_refine_ls_number_parameters      376 
_refine_ls_number_restraints      64 
_refine_ls_R_factor_all           0.1286 
_refine_ls_R_factor_gt            0.0833 
_refine_ls_wR_factor_ref          0.2512 
_refine_ls_wR_factor_gt           0.2077 
_refine_ls_goodness_of_fit_ref    1.019 
_refine_ls_restrained_S_all       1.024 
_refine_ls_shift/su_max           0.000 
_refine_ls_shift/su_mean          0.000 
 
loop_ 
 _atom_site_label 
 _atom_site_type_symbol 
 _atom_site_fract_x 
 _atom_site_fract_y 
 _atom_site_fract_z 
 _atom_site_U_iso_or_equiv 
 _atom_site_adp_type 
 _atom_site_occupancy 
 _atom_site_symmetry_multiplicity 
 _atom_site_calc_flag 
 _atom_site_refinement_flags 
 _atom_site_disorder_assembly 
 _atom_site_disorder_group 
N8 N 0.4838(4) 0.6258(3) 0.0962(3) 0.1106(11) Uani 0.574(4) 1 d PGU A 1 
O3 O 0.5033(5) 0.7511(4) -0.0099(3) 0.1376(14) Uani 0.574(4) 1 d PGU A 1 
C29 C 0.3325(5) 0.5903(6) 0.0436(4) 0.141(3) Uani 0.574(4) 1 d PGU A 1 
H29A H 0.3067 0.6053 -0.0260 0.211 Uiso 0.574(4) 1 calc PR A 1 
H29B H 0.2818 0.6386 0.0797 0.211 Uiso 0.574(4) 1 calc PR A 1 
H29C H 0.3096 0.5038 0.0427 0.211 Uiso 0.574(4) 1 calc PR A 1 
C30 C 0.5467(6) 0.5676(5) 0.1863(4) 0.155(3) Uani 0.574(4) 1 d PGU A 1 
H30A H 0.6163 0.5180 0.1743 0.232 Uiso 0.574(4) 1 calc PR A 1 
H30B H 0.4746 0.5158 0.1972 0.232 Uiso 0.574(4) 1 calc PR A 1 
H30C H 0.5902 0.6308 0.2464 0.232 Uiso 0.574(4) 1 calc PR A 1 
C31 C 0.5607(4) 0.7049(3) 0.0656(3) 0.1159(18) Uani 0.574(4) 1 d PGU A 1 
H31 H 0.6568 0.7247 0.1013 0.139 Uiso 0.574(4) 1 calc PR A 1 
N8' N 0.5124(4) 0.6261(3) 0.1060(3) 0.1106(11) Uani 0.426(4) 1 d PGU A 2 
O3' O 0.5442(5) 0.7469(4) -0.0015(3) 0.1376(14) Uani 0.426(4) 1 d PGU A 2 
C29' C 0.6633(5) 0.6463(6) 0.1667(4) 0.141(3) Uani 0.426(4) 1 d PGU A 2 
H29D H 0.7150 0.6105 0.1252 0.211 Uiso 0.426(4) 1 calc PR A 2 
H29E H 0.6799 0.6080 0.2266 0.211 Uiso 0.426(4) 1 calc PR A 2 
H29F H 0.6936 0.7338 0.1881 0.211 Uiso 0.426(4) 1 calc PR A 2 
C30' C 0.4274(6) 0.5454(5) 0.1434(4) 0.155(3) Uani 0.426(4) 1 d PGU A 2 
H30D H 0.4324 0.5827 0.2116 0.232 Uiso 0.426(4) 1 calc PR A 2 
H30E H 0.4626 0.4664 0.1454 0.232 Uiso 0.426(4) 1 calc PR A 2 
H30F H 0.3313 0.5341 0.0977 0.232 Uiso 0.426(4) 1 calc PR A 2 
C31' C 0.4627(4) 0.6794(3) 0.0239(2) 0.1159(18) Uani 0.426(4) 1 d PGU A 2 
H31' H 0.3670 0.6663 -0.0146 0.139 Uiso 0.426(4) 1 calc PR A 2 
O1 O 0.3340(2) 0.26332(18) 0.26954(14) 0.0564(5) Uani 1 1 d . . . 
O2 O 0.2354(2) 0.4334(2) 0.23945(16) 0.0679(6) Uani 1 1 d . . . 
N1 N 0.1546(2) 0.0041(2) -0.06652(17) 0.0510(6) Uani 1 1 d . . . 
H1 H 0.1577 -0.0638 -0.1051 0.061 Uiso 1 1 calc R . . 
N2 N 0.1865(2) 0.1455(2) 0.07200(18) 0.0543(6) Uani 1 1 d . . . 
H2D H 0.2136 0.1809 0.1358 0.065 Uiso 1 1 calc R . . 
N3 N 0.3411(2) 0.0544(2) 0.36177(18) 0.0558(6) Uani 1 1 d . . . 
H3D H 0.3480 0.1217 0.3381 0.067 Uiso 1 1 calc R . . 
N4 N 0.3617(3) -0.1423(2) 0.3804(2) 0.0640(7) Uani 1 1 d . . . 
N5 N 0.6011(2) 0.2376(2) 0.25673(17) 0.0516(6) Uani 1 1 d . . . 
H5D H 0.5256 0.2428 0.2719 0.062 Uiso 1 1 calc R . . 
N6 N 0.7525(2) 0.1634(2) 0.18793(17) 0.0512(6) Uani 1 1 d . . . 
N7 N 0.4155(2) 0.0088(2) 0.18035(16) 0.0486(6) Uani 1 1 d . . . 
C1 C 0.0913(3) 0.1061(3) -0.0987(2) 0.0512(7) Uani 1 1 d . . . 
C2 C 0.0193(3) 0.1281(3) -0.1977(2) 0.0616(9) Uani 1 1 d . . . 
H2 H 0.0048 0.0686 -0.2563 0.074 Uiso 1 1 calc R . . 
C3 C -0.0288(4) 0.2406(3) -0.2044(3) 0.0754(11) Uani 1 1 d . . . 
H3 H -0.0759 0.2585 -0.2693 0.091 Uiso 1 1 calc R . . 
C4 C -0.0096(5) 0.3303(4) -0.1166(3) 0.0851(12) Uani 1 1 d . . . 
H4 H -0.0456 0.4055 -0.1244 0.102 Uiso 1 1 calc R . . 
C5 C 0.0615(4) 0.3092(3) -0.0194(3) 0.0737(10) Uani 1 1 d . . . 
H5 H 0.0755 0.3688 0.0391 0.088 Uiso 1 1 calc R . . 
C6 C 0.1113(3) 0.1959(3) -0.0119(2) 0.0533(8) Uani 1 1 d . . . 
C7 C 0.2096(3) 0.0321(3) 0.0362(2) 0.0478(7) Uani 1 1 d . . . 
C8 C 0.2835(3) -0.0527(3) 0.1029(2) 0.0539(8) Uani 1 1 d . . . 
H8A H 0.2229 -0.0843 0.1373 0.065 Uiso 1 1 calc R . . 
H8B H 0.3028 -0.1227 0.0603 0.065 Uiso 1 1 calc R . . 
C9 C 0.2803(3) 0.0352(3) 0.4350(2) 0.0598(8) Uani 1 1 d . . . 
C10 C 0.2186(4) 0.1121(4) 0.4914(3) 0.0733(10) Uani 1 1 d . . . 
H10 H 0.2127 0.1948 0.4847 0.088 Uiso 1 1 calc R . . 
C11 C 0.1667(4) 0.0605(5) 0.5578(3) 0.0848(12) Uani 1 1 d . . . 
H11 H 0.1253 0.1090 0.5979 0.102 Uiso 1 1 calc R . . 
C12 C 0.1754(4) -0.0652(5) 0.5655(3) 0.0925(14) Uani 1 1 d . . . 
H12 H 0.1375 -0.0982 0.6099 0.111 Uiso 1 1 calc R . . 
C13 C 0.2368(4) -0.1400(4) 0.5108(3) 0.0793(11) Uani 1 1 d . . . 
H13 H 0.2424 -0.2228 0.5175 0.095 Uiso 1 1 calc R . . 
C14 C 0.2912(3) -0.0880(3) 0.4444(2) 0.0604(9) Uani 1 1 d . . . 
C15 C 0.3872(3) -0.0535(3) 0.3352(2) 0.0530(8) Uani 1 1 d . . . 
C16 C 0.4685(3) -0.0636(3) 0.2625(2) 0.0567(8) Uani 1 1 d . . . 
H16A H 0.5670 -0.0342 0.3009 0.068 Uiso 1 1 calc R . . 
H16B H 0.4620 -0.1501 0.2318 0.068 Uiso 1 1 calc R . . 
C17 C 0.7197(3) 0.3256(3) 0.2932(2) 0.0512(7) Uani 1 1 d . . . 
C18 C 0.7527(4) 0.4383(3) 0.3607(2) 0.0626(8) Uani 1 1 d . . . 
H18 H 0.6909 0.4690 0.3924 0.075 Uiso 1 1 calc R . . 
C19 C 0.8816(4) 0.5019(3) 0.3779(3) 0.0743(10) Uani 1 1 d . . . 
H19 H 0.9070 0.5785 0.4220 0.089 Uiso 1 1 calc R . . 
C20 C 0.9758(4) 0.4571(3) 0.3325(3) 0.0727(10) Uani 1 1 d . . . 
H20 H 1.0617 0.5043 0.3462 0.087 Uiso 1 1 calc R . . 
C21 C 0.9441(3) 0.3432(3) 0.2671(3) 0.0649(9) Uani 1 1 d . . . 
H21 H 1.0075 0.3116 0.2373 0.078 Uiso 1 1 calc R . . 
C22 C 0.8147(3) 0.2791(3) 0.2482(2) 0.0522(7) Uani 1 1 d . . . 
C23 C 0.6246(3) 0.1441(3) 0.1943(2) 0.0472(7) Uani 1 1 d . . . 
C24 C 0.5191(3) 0.0379(3) 0.1333(2) 0.0530(7) Uani 1 1 d . . . 
H24A H 0.4711 0.0562 0.0652 0.064 Uiso 1 1 calc R . . 
H24B H 0.5671 -0.0344 0.1245 0.064 Uiso 1 1 calc R . . 
C25 C 0.3184(3) 0.3751(3) 0.2951(2) 0.0472(7) Uani 1 1 d . . . 
C26 C 0.4867(3) 0.3729(3) 0.4756(2) 0.0523(7) Uani 1 1 d . . . 
H26 H 0.4779 0.2868 0.4591 0.063 Uiso 1 1 calc R . . 
C27 C 0.4122(3) 0.4391(3) 0.4036(2) 0.0468(7) Uani 1 1 d . . . 
C28 C 0.4259(3) 0.5670(3) 0.4281(2) 0.0505(7) Uani 1 1 d . . . 
H28 H 0.3763 0.6125 0.3797 0.061 Uiso 1 1 calc R . . 
 
loop_ 
 _atom_site_aniso_label 
 _atom_site_aniso_U_11 
 _atom_site_aniso_U_22 
 _atom_site_aniso_U_33 
 _atom_site_aniso_U_23 
 _atom_site_aniso_U_13 
 _atom_site_aniso_U_12 
N8 0.128(3) 0.111(2) 0.118(3) 0.0405(19) 0.066(2) 0.014(2) 
O3 0.203(4) 0.122(2) 0.119(2) 0.0635(19) 0.076(3) 0.028(2) 
C29 0.114(3) 0.156(6) 0.165(6) 0.040(5) 0.056(4) 0.040(4) 
C30 0.160(6) 0.168(6) 0.144(5) 0.069(4) 0.048(5) 0.002(6) 
C31 0.136(4) 0.117(4) 0.113(4) 0.038(3) 0.059(3) 0.024(3) 
N8' 0.128(3) 0.111(2) 0.118(3) 0.0405(19) 0.066(2) 0.014(2) 
O3' 0.203(4) 0.122(2) 0.119(2) 0.0635(19) 0.076(3) 0.028(2) 
C29' 0.114(3) 0.156(6) 0.165(6) 0.040(5) 0.056(4) 0.040(4) 
C30' 0.160(6) 0.168(6) 0.144(5) 0.069(4) 0.048(5) 0.002(6) 
C31' 0.136(4) 0.117(4) 0.113(4) 0.038(3) 0.059(3) 0.024(3) 
O1 0.0680(12) 0.0566(12) 0.0369(10) -0.0050(9) 0.0146(9) 0.0024(9) 
O2 0.0677(13) 0.0726(13) 0.0457(12) -0.0010(10) 0.0013(11) 0.0065(11) 
N1 0.0517(13) 0.0625(14) 0.0349(12) -0.0030(10) 0.0163(10) -0.0024(11) 
N2 0.0582(14) 0.0653(15) 0.0292(12) -0.0010(11) 0.0068(10) 0.0007(11) 
N3 0.0641(15) 0.0641(15) 0.0388(13) 0.0109(11) 0.0181(11) -0.0019(12) 
N4 0.0656(16) 0.0747(16) 0.0460(14) 0.0230(13) 0.0072(12) 0.0028(13) 
N5 0.0476(12) 0.0670(15) 0.0398(13) 0.0029(11) 0.0186(10) 0.0006(11) 
N6 0.0480(13) 0.0661(14) 0.0369(12) 0.0059(11) 0.0140(10) -0.0005(11) 
N7 0.0478(12) 0.0631(14) 0.0317(11) 0.0081(10) 0.0110(10) -0.0003(10) 
C1 0.0481(15) 0.0656(17) 0.0346(15) 0.0045(13) 0.0103(12) 0.0000(13) 
C2 0.0626(18) 0.083(2) 0.0312(15) 0.0042(14) 0.0110(13) -0.0039(16) 
C3 0.083(2) 0.083(2) 0.0442(18) 0.0151(17) -0.0005(17) 0.0038(19) 
C4 0.105(3) 0.071(2) 0.064(2) 0.0167(18) 0.006(2) 0.016(2) 
C5 0.092(2) 0.063(2) 0.052(2) -0.0003(16) 0.0106(18) 0.0088(17) 
C6 0.0590(17) 0.0594(17) 0.0341(15) -0.0022(13) 0.0119(13) -0.0007(13) 
C7 0.0461(15) 0.0574(16) 0.0368(15) 0.0037(12) 0.0135(12) -0.0012(12) 
C8 0.0528(16) 0.0599(17) 0.0432(16) 0.0037(13) 0.0130(13) -0.0025(13) 
C9 0.0512(16) 0.089(2) 0.0357(15) 0.0125(15) 0.0112(13) -0.0028(15) 
C10 0.0622(19) 0.110(3) 0.0477(18) 0.0132(18) 0.0198(16) 0.0051(19) 
C11 0.059(2) 0.152(4) 0.0460(19) 0.022(2) 0.0196(16) 0.013(2) 
C12 0.053(2) 0.177(4) 0.050(2) 0.051(2) 0.0117(16) 0.000(2) 
C13 0.060(2) 0.125(3) 0.0522(19) 0.040(2) 0.0102(16) 0.000(2) 
C14 0.0510(17) 0.088(2) 0.0343(15) 0.0181(15) 0.0040(13) -0.0043(15) 
C15 0.0532(16) 0.0630(18) 0.0346(15) 0.0101(13) 0.0048(13) 0.0001(13) 
C16 0.0576(17) 0.0675(18) 0.0401(16) 0.0084(14) 0.0110(13) 0.0056(14) 
C17 0.0510(15) 0.0633(17) 0.0381(15) 0.0071(13) 0.0156(12) 0.0018(13) 
C18 0.0663(19) 0.0674(19) 0.0512(18) 0.0001(15) 0.0229(15) -0.0014(15) 
C19 0.080(2) 0.069(2) 0.066(2) -0.0022(17) 0.0234(18) -0.0061(18) 
C20 0.0626(19) 0.077(2) 0.071(2) 0.0004(18) 0.0225(18) -0.0141(16) 
C21 0.0547(18) 0.084(2) 0.0543(19) 0.0037(16) 0.0217(15) 0.0002(16) 
C22 0.0513(16) 0.0673(18) 0.0354(14) 0.0064(13) 0.0139(12) 0.0004(13) 
C23 0.0500(15) 0.0627(17) 0.0292(13) 0.0056(12) 0.0155(11) 0.0042(13) 
C24 0.0550(16) 0.0658(17) 0.0355(15) -0.0028(13) 0.0185(13) -0.0012(13) 
C25 0.0451(14) 0.0578(17) 0.0343(14) 0.0015(12) 0.0122(12) -0.0006(12) 
C26 0.0637(17) 0.0498(15) 0.0408(15) 0.0009(12) 0.0178(13) 0.0052(13) 
C27 0.0469(14) 0.0544(16) 0.0372(14) -0.0014(12) 0.0168(12) 0.0006(12) 
C28 0.0524(16) 0.0581(17) 0.0374(15) 0.0036(12) 0.0132(12) 0.0046(13) 
 
_geom_special_details 
; 
 All esds (except the esd in the dihedral angle between two l.s. planes) 
 are estimated using the full covariance matrix.  The cell esds are taken 
 into account individually in the estimation of esds in distances, angles 
 and torsion angles; correlations between esds in cell parameters are only 
 used when they are defined by crystal symmetry.  An approximate (isotropic) 
 treatment of cell esds is used for estimating esds involving l.s. planes. 
; 
 
loop_ 
 _geom_bond_atom_site_label_1 
 _geom_bond_atom_site_label_2 
 _geom_bond_distance 
 _geom_bond_site_symmetry_2 
 _geom_bond_publ_flag 
N8 C31 1.334(2) . ? 
N8 C29 1.462(2) . ? 
N8 C30 1.468(2) . ? 
O3 C31 1.224(2) . ? 
C29 H29A 0.9600 . ? 
C29 H29B 0.9600 . ? 
C29 H29C 0.9600 . ? 
C30 H30A 0.9600 . ? 
C30 H30B 0.9600 . ? 
C30 H30C 0.9600 . ? 
C31 H31 0.9300 . ? 
N8' C31' 1.327(2) . ? 
N8' C30' 1.458(2) . ? 
N8' C29' 1.467(2) . ? 
O3' C31' 1.243(2) . ? 
C29' H29D 0.9600 . ? 
C29' H29E 0.9600 . ? 
C29' H29F 0.9600 . ? 
C30' H30D 0.9600 . ? 
C30' H30E 0.9600 . ? 
C30' H30F 0.9600 . ? 
C31' H31' 0.9300 . ? 
O1 C25 1.261(3) . ? 
O2 C25 1.228(3) . ? 
N1 C7 1.332(3) . ? 
N1 C1 1.385(4) . ? 
N1 H1 0.8600 . ? 
N2 C7 1.336(4) . ? 
N2 C6 1.383(4) . ? 
N2 H2D 0.8600 . ? 
N3 C15 1.346(4) . ? 
N3 C9 1.386(4) . ? 
N3 H3D 0.8600 . ? 
N4 C15 1.291(4) . ? 
N4 C14 1.405(4) . ? 
N5 C23 1.330(4) . ? 
N5 C17 1.392(4) . ? 
N5 H5D 0.8600 . ? 
N6 C23 1.333(4) . ? 
N6 C22 1.395(4) . ? 
N7 C24 1.449(4) . ? 
N7 C8 1.458(3) . ? 
N7 C16 1.467(4) . ? 
C1 C6 1.390(4) . ? 
C1 C2 1.398(4) . ? 
C2 C3 1.361(5) . ? 
C2 H2 0.9300 . ? 
C3 C4 1.402(5) . ? 
C3 H3 0.9300 . ? 
C4 C5 1.371(5) . ? 
C4 H4 0.9300 . ? 
C5 C6 1.378(4) . ? 
C5 H5 0.9300 . ? 
C7 C8 1.476(4) . ? 
C8 H8A 0.9700 . ? 
C8 H8B 0.9700 . ? 
C9 C10 1.383(5) . ? 
C9 C14 1.386(5) . ? 
C10 C11 1.373(5) . ? 
C10 H10 0.9300 . ? 
C11 C12 1.406(6) . ? 
C11 H11 0.9300 . ? 
C12 C13 1.354(6) . ? 
C12 H12 0.9300 . ? 
C13 C14 1.390(5) . ? 
C13 H13 0.9300 . ? 
C15 C16 1.496(5) . ? 
C16 H16A 0.9700 . ? 
C16 H16B 0.9700 . ? 
C17 C18 1.385(4) . ? 
C17 C22 1.394(4) . ? 
C18 C19 1.369(5) . ? 
C18 H18 0.9300 . ? 
C19 C20 1.384(5) . ? 
C19 H19 0.9300 . ? 
C20 C21 1.384(5) . ? 
C20 H20 0.9300 . ? 
C21 C22 1.372(4) . ? 
C21 H21 0.9300 . ? 
C23 C24 1.472(4) . ? 
C24 H24A 0.9700 . ? 
C24 H24B 0.9700 . ? 
C25 C27 1.527(4) . ? 
C26 C27 1.377(4) . ? 
C26 C28 1.378(4) 2_666 ? 
C26 H26 0.9300 . ? 
C27 C28 1.381(4) . ? 
C28 C26 1.378(4) 2_666 ? 
C28 H28 0.9300 . ? 
 
loop_ 
 _geom_angle_atom_site_label_1 
 _geom_angle_atom_site_label_2 
 _geom_angle_atom_site_label_3 
 _geom_angle 
 _geom_angle_site_symmetry_1 
 _geom_angle_site_symmetry_3 
 _geom_angle_publ_flag 
C31 N8 C29 123.3 . . ? 
C31 N8 C30 121.7 . . ? 
C29 N8 C30 115.0 . . ? 
O3 C31 N8 119.2 . . ? 
O3 C31 H31 120.4 . . ? 
N8 C31 H31 120.4 . . ? 
C31' N8' C30' 124.9 . . ? 
C31' N8' C29' 120.2 . . ? 
C30' N8' C29' 114.9 . . ? 
N8' C29' H29D 109.5 . . ? 
N8' C29' H29E 109.5 . . ? 
H29D C29' H29E 109.5 . . ? 
N8' C29' H29F 109.5 . . ? 
H29D C29' H29F 109.5 . . ? 
H29E C29' H29F 109.5 . . ? 
N8' C30' H30D 109.5 . . ? 
N8' C30' H30E 109.5 . . ? 
H30D C30' H30E 109.5 . . ? 
N8' C30' H30F 109.5 . . ? 
H30D C30' H30F 109.5 . . ? 
H30E C30' H30F 109.5 . . ? 
O3' C31' N8' 119.9 . . ? 
O3' C31' H31' 120.1 . . ? 
N8' C31' H31' 120.1 . . ? 
C7 N1 C1 106.2(2) . . ? 
C7 N1 H1 126.9 . . ? 
C1 N1 H1 126.9 . . ? 
C7 N2 C6 107.8(2) . . ? 
C7 N2 H2D 126.1 . . ? 
C6 N2 H2D 126.1 . . ? 
C15 N3 C9 106.2(3) . . ? 
C15 N3 H3D 126.9 . . ? 
C9 N3 H3D 126.9 . . ? 
C15 N4 C14 103.5(3) . . ? 
C23 N5 C17 108.2(2) . . ? 
C23 N5 H5D 125.9 . . ? 
C17 N5 H5D 125.9 . . ? 
C23 N6 C22 107.1(2) . . ? 
C24 N7 C8 111.3(2) . . ? 
C24 N7 C16 112.3(2) . . ? 
C8 N7 C16 111.5(2) . . ? 
N1 C1 C6 108.4(2) . . ? 
N1 C1 C2 130.8(3) . . ? 
C6 C1 C2 120.8(3) . . ? 
C3 C2 C1 116.9(3) . . ? 
C3 C2 H2 121.6 . . ? 
C1 C2 H2 121.6 . . ? 
C2 C3 C4 122.2(3) . . ? 
C2 C3 H3 118.9 . . ? 
C4 C3 H3 118.9 . . ? 
C5 C4 C3 121.1(3) . . ? 
C5 C4 H4 119.5 . . ? 
C3 C4 H4 119.5 . . ? 
C4 C5 C6 117.2(3) . . ? 
C4 C5 H5 121.4 . . ? 
C6 C5 H5 121.4 . . ? 
C5 C6 N2 132.1(3) . . ? 
C5 C6 C1 122.0(3) . . ? 
N2 C6 C1 105.9(3) . . ? 
N1 C7 N2 111.7(2) . . ? 
N1 C7 C8 124.4(3) . . ? 
N2 C7 C8 123.9(3) . . ? 
N7 C8 C7 112.0(2) . . ? 
N7 C8 H8A 109.2 . . ? 
C7 C8 H8A 109.2 . . ? 
N7 C8 H8B 109.2 . . ? 
C7 C8 H8B 109.2 . . ? 
H8A C8 H8B 107.9 . . ? 
C10 C9 N3 132.6(3) . . ? 
C10 C9 C14 122.5(3) . . ? 
N3 C9 C14 104.9(3) . . ? 
C11 C10 C9 116.8(4) . . ? 
C11 C10 H10 121.6 . . ? 
C9 C10 H10 121.6 . . ? 
C10 C11 C12 120.5(4) . . ? 
C10 C11 H11 119.8 . . ? 
C12 C11 H11 119.8 . . ? 
C13 C12 C11 122.6(4) . . ? 
C13 C12 H12 118.7 . . ? 
C11 C12 H12 118.7 . . ? 
C12 C13 C14 117.2(4) . . ? 
C12 C13 H13 121.4 . . ? 
C14 C13 H13 121.4 . . ? 
C9 C14 C13 120.4(3) . . ? 
C9 C14 N4 110.1(3) . . ? 
C13 C14 N4 129.5(3) . . ? 
N4 C15 N3 115.2(3) . . ? 
N4 C15 C16 124.0(3) . . ? 
N3 C15 C16 120.7(3) . . ? 
N7 C16 C15 111.7(2) . . ? 
N7 C16 H16A 109.3 . . ? 
C15 C16 H16A 109.3 . . ? 
N7 C16 H16B 109.3 . . ? 
C15 C16 H16B 109.3 . . ? 
H16A C16 H16B 107.9 . . ? 
C18 C17 N5 132.5(3) . . ? 
C18 C17 C22 121.4(3) . . ? 
N5 C17 C22 106.1(2) . . ? 
C19 C18 C17 116.2(3) . . ? 
C19 C18 H18 121.9 . . ? 
C17 C18 H18 121.9 . . ? 
C18 C19 C20 122.8(3) . . ? 
C18 C19 H19 118.6 . . ? 
C20 C19 H19 118.6 . . ? 
C19 C20 C21 121.1(3) . . ? 
C19 C20 H20 119.5 . . ? 
C21 C20 H20 119.5 . . ? 
C22 C21 C20 116.7(3) . . ? 
C22 C21 H21 121.6 . . ? 
C20 C21 H21 121.6 . . ? 
C21 C22 C17 121.8(3) . . ? 
C21 C22 N6 130.8(3) . . ? 
C17 C22 N6 107.4(2) . . ? 
N5 C23 N6 111.2(2) . . ? 
N5 C23 C24 124.5(3) . . ? 
N6 C23 C24 124.1(3) . . ? 
N7 C24 C23 113.3(2) . . ? 
N7 C24 H24A 108.9 . . ? 
C23 C24 H24A 108.9 . . ? 
N7 C24 H24B 108.9 . . ? 
C23 C24 H24B 108.9 . . ? 
H24A C24 H24B 107.7 . . ? 
O2 C25 O1 124.7(3) . . ? 
O2 C25 C27 119.5(3) . . ? 
O1 C25 C27 115.8(2) . . ? 
C27 C26 C28 120.6(3) . 2_666 ? 
C27 C26 H26 119.7 . . ? 
C28 C26 H26 119.7 2_666 . ? 
C26 C27 C28 119.5(2) . . ? 
C26 C27 C25 121.6(3) . . ? 
C28 C27 C25 118.8(3) . . ? 
C26 C28 C27 119.8(3) 2_666 . ? 
C26 C28 H28 120.1 2_666 . ? 
C27 C28 H28 120.1 . . ? 
 
loop_ 
 _geom_torsion_atom_site_label_1 
 _geom_torsion_atom_site_label_2 
 _geom_torsion_atom_site_label_3 
 _geom_torsion_atom_site_label_4 
 _geom_torsion 
 _geom_torsion_site_symmetry_1 
 _geom_torsion_site_symmetry_2 
 _geom_torsion_site_symmetry_3 
 _geom_torsion_site_symmetry_4 
 _geom_torsion_publ_flag 
C29 N8 C31 O3 0.2 . . . . ? 
C30 N8 C31 O3 -179.9 . . . . ? 
C30' N8' C31' O3' 179.9 . . . . ? 
C29' N8' C31' O3' -0.1 . . . . ? 
C7 N1 C1 C6 0.4(3) . . . . ? 
C7 N1 C1 C2 179.3(3) . . . . ? 
N1 C1 C2 C3 -178.5(3) . . . . ? 
C6 C1 C2 C3 0.3(5) . . . . ? 
C1 C2 C3 C4 -1.0(5) . . . . ? 
C2 C3 C4 C5 1.2(6) . . . . ? 
C3 C4 C5 C6 -0.8(6) . . . . ? 
C4 C5 C6 N2 179.4(4) . . . . ? 
C4 C5 C6 C1 0.1(5) . . . . ? 
C7 N2 C6 C5 -179.3(4) . . . . ? 
C7 N2 C6 C1 0.1(3) . . . . ? 
N1 C1 C6 C5 179.1(3) . . . . ? 
C2 C1 C6 C5 0.1(5) . . . . ? 
N1 C1 C6 N2 -0.3(3) . . . . ? 
C2 C1 C6 N2 -179.4(3) . . . . ? 
C1 N1 C7 N2 -0.4(3) . . . . ? 
C1 N1 C7 C8 178.0(3) . . . . ? 
C6 N2 C7 N1 0.2(3) . . . . ? 
C6 N2 C7 C8 -178.2(3) . . . . ? 
C24 N7 C8 C7 -69.2(3) . . . . ? 
C16 N7 C8 C7 164.6(2) . . . . ? 
N1 C7 C8 N7 133.2(3) . . . . ? 
N2 C7 C8 N7 -48.7(4) . . . . ? 
C15 N3 C9 C10 178.3(3) . . . . ? 
C15 N3 C9 C14 -1.9(3) . . . . ? 
N3 C9 C10 C11 179.3(3) . . . . ? 
C14 C9 C10 C11 -0.5(5) . . . . ? 
C9 C10 C11 C12 -0.8(5) . . . . ? 
C10 C11 C12 C13 1.4(5) . . . . ? 
C11 C12 C13 C14 -0.6(5) . . . . ? 
C10 C9 C14 C13 1.3(4) . . . . ? 
N3 C9 C14 C13 -178.5(3) . . . . ? 
C10 C9 C14 N4 -178.3(3) . . . . ? 
N3 C9 C14 N4 1.9(3) . . . . ? 
C12 C13 C14 C9 -0.7(5) . . . . ? 
C12 C13 C14 N4 178.8(3) . . . . ? 
C15 N4 C14 C9 -1.1(3) . . . . ? 
C15 N4 C14 C13 179.3(3) . . . . ? 
C14 N4 C15 N3 -0.1(3) . . . . ? 
C14 N4 C15 C16 176.6(3) . . . . ? 
C9 N3 C15 N4 1.3(3) . . . . ? 
C9 N3 C15 C16 -175.5(2) . . . . ? 
C24 N7 C16 C15 158.9(2) . . . . ? 
C8 N7 C16 C15 -75.5(3) . . . . ? 
N4 C15 C16 N7 146.1(3) . . . . ? 
N3 C15 C16 N7 -37.4(3) . . . . ? 
C23 N5 C17 C18 -178.8(3) . . . . ? 
C23 N5 C17 C22 0.3(3) . . . . ? 
N5 C17 C18 C19 -179.2(3) . . . . ? 
C22 C17 C18 C19 1.7(5) . . . . ? 
C17 C18 C19 C20 -0.9(5) . . . . ? 
C18 C19 C20 C21 -0.7(6) . . . . ? 
C19 C20 C21 C22 1.3(5) . . . . ? 
C20 C21 C22 C17 -0.4(5) . . . . ? 
C20 C21 C22 N6 -179.3(3) . . . . ? 
C18 C17 C22 C21 -1.1(5) . . . . ? 
N5 C17 C22 C21 179.6(3) . . . . ? 
C18 C17 C22 N6 178.0(3) . . . . ? 
N5 C17 C22 N6 -1.3(3) . . . . ? 
C23 N6 C22 C21 -179.2(3) . . . . ? 
C23 N6 C22 C17 1.8(3) . . . . ? 
C17 N5 C23 N6 0.8(3) . . . . ? 
C17 N5 C23 C24 -174.4(3) . . . . ? 
C22 N6 C23 N5 -1.7(3) . . . . ? 
C22 N6 C23 C24 173.6(3) . . . . ? 
C8 N7 C24 C23 154.0(2) . . . . ? 
C16 N7 C24 C23 -80.3(3) . . . . ? 
N5 C23 C24 N7 -28.7(4) . . . . ? 
N6 C23 C24 N7 156.7(3) . . . . ? 
C28 C26 C27 C28 0.3(5) 2_666 . . . ? 
C28 C26 C27 C25 178.0(3) 2_666 . . . ? 
O2 C25 C27 C26 167.4(3) . . . . ? 
O1 C25 C27 C26 -13.0(4) . . . . ? 
O2 C25 C27 C28 -14.9(4) . . . . ? 
O1 C25 C27 C28 164.7(3) . . . . ? 
C26 C27 C28 C26 -0.3(5) . . . 2_666 ? 
C25 C27 C28 C26 -178.0(3) . . . 2_666 ? 
 
loop_ 
 _geom_hbond_atom_site_label_D 
 _geom_hbond_atom_site_label_H 
 _geom_hbond_atom_site_label_A 
 _geom_hbond_distance_DH 
 _geom_hbond_distance_HA 
 _geom_hbond_distance_DA 
 _geom_hbond_angle_DHA 
 _geom_hbond_site_symmetry_A 
N1 H1 N6  0.86 1.95 2.733(3) 151.1 2_655 
N2 H2D O1  0.86 1.91 2.732(3) 160.2 . 
N3 H3D O1  0.86 1.93 2.783(4) 170.9 . 
N5 H5D O1  0.86 1.96 2.798(4) 165.0 . 
 
_diffrn_measured_fraction_theta_max    0.971 
_diffrn_reflns_theta_full              25.50 
_diffrn_measured_fraction_theta_full   0.971 
_refine_diff_density_max    0.570 
_refine_diff_density_min   -0.316 
_refine_diff_density_rms    0.071 
